# Supplementary material
Source: PubMed Central journal article supplement (PMC3946471)
Supplement: NIHMS524465-supplement-1_si_001.pdf [file NIHMS524465-supplement-1_si_001.pdf]

## Supporting Information

### **Familial Alzheimer's Disease Osaka Mutant ( $\Delta$ E22) $\beta$ -Barrels Suggest an Explanation for the Different $A\beta_{1-40/42}$ Preferred Conformational States Observed by Experiment**

Hyunbum Jang,<sup>†</sup> Fernando Teran Arce,<sup>‡</sup> Srinivasan Ramachandran,<sup>‡</sup> Bruce L. Kagan,<sup>§</sup> Ratnesh Lal,<sup>‡</sup> and Ruth Nussinov<sup>\*,†,||</sup>

<sup>†</sup>Basic Science Program, SAIC-Frederick, Inc., Cancer and Inflammation Program, National Cancer Institute, Frederick, Maryland 21702, USA

<sup>‡</sup>Departments of Bioengineering and of Mechanical and Aerospace Engineering, and Materials Science Program, University of California, San Diego, La Jolla, California 92093, USA

<sup>§</sup>Department of Psychiatry, David Geffen School of Medicine, Semel Institute for Neuroscience and Human Behavior, University of California, Los Angeles, California 90024, USA

<sup>||</sup>Department of Human Molecular Genetics and Biochemistry, Sackler School of Medicine, Tel Aviv University, Tel Aviv 69978, Israel

#### **Corresponding Author**

\*R.N.: Basic Science Program, SAIC-Frederick, Inc., Cancer and Inflammation Program, National Cancer Institute, Frederick, Maryland 21702, USA, Tel: 301-846-5579, E-mail: [nussinov@helix.nih.gov](mailto:nussinov@helix.nih.gov)

**Title Running Head:** Structure of FAD-linked Osaka mutant  $\Delta$ E22 barrel

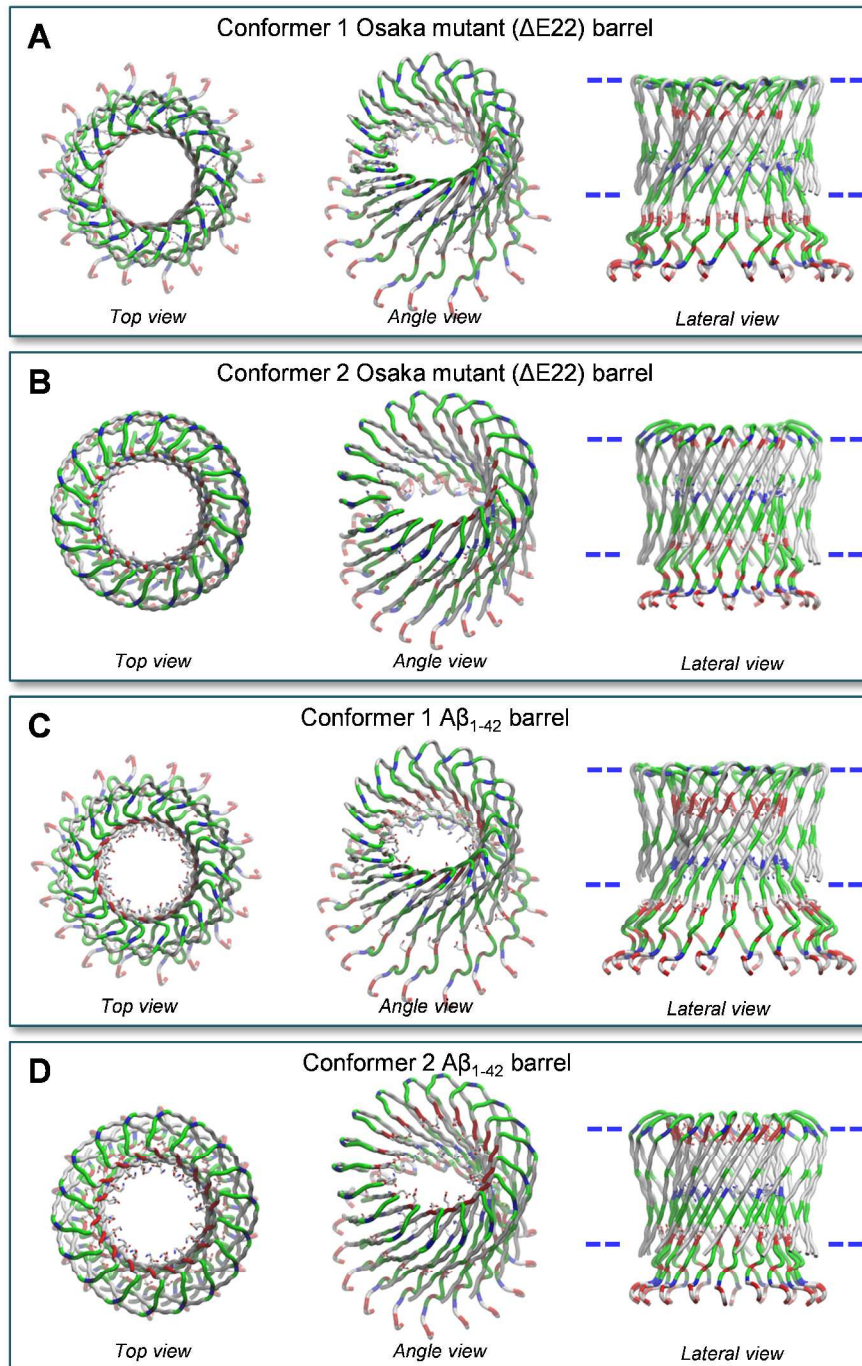

**Figure S1.** The initial barrel structures of MD simulations in ribbon representation for the (A) conformer 1 and (B) conformer 2 Osaka mutant ( $\Delta E22$ ) barrels, and the (C) conformer 1 and (D) conformer 2  $A\beta_{1-42}$  barrels. In the peptide ribbon, hydrophobic, polar/Gly, positively charged, and negatively charged residues are colored white, green, blue, and red, respectively. Charged side-chains of three selected residues, Glu11 and Lys16 for both mutant and wild type barrels, and Glu22 for the wild type barrels only, are shown as threads.

**A**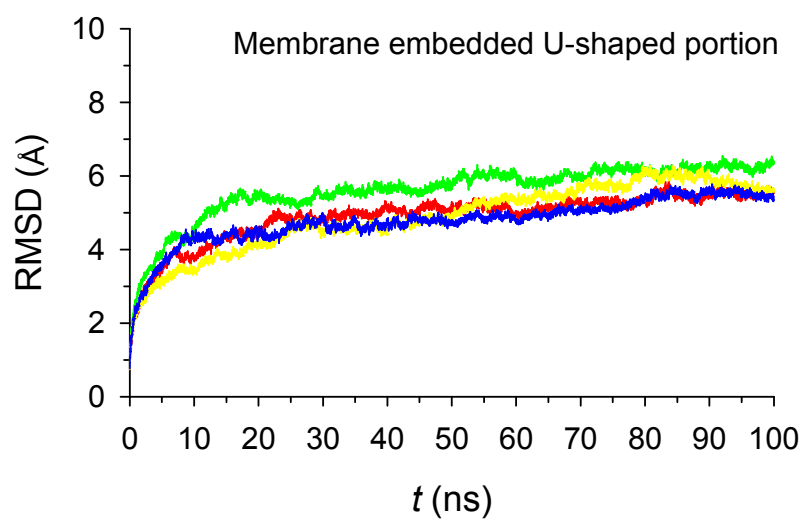**B**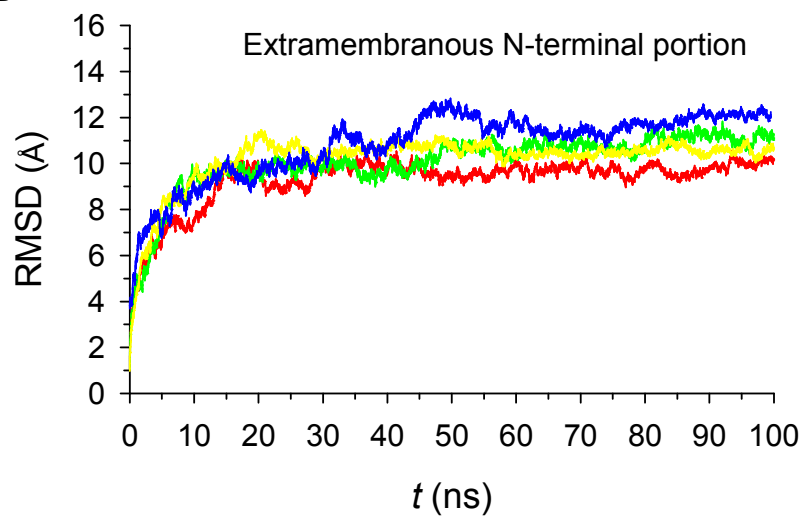

- Conformer 1  $\Delta$ E22 barrel
- Conformer 2  $\Delta$ E22 barrel
- Conformer 1 A $\beta_{1-42}$  barrel
- Conformer 2 A $\beta_{1-42}$  barrel

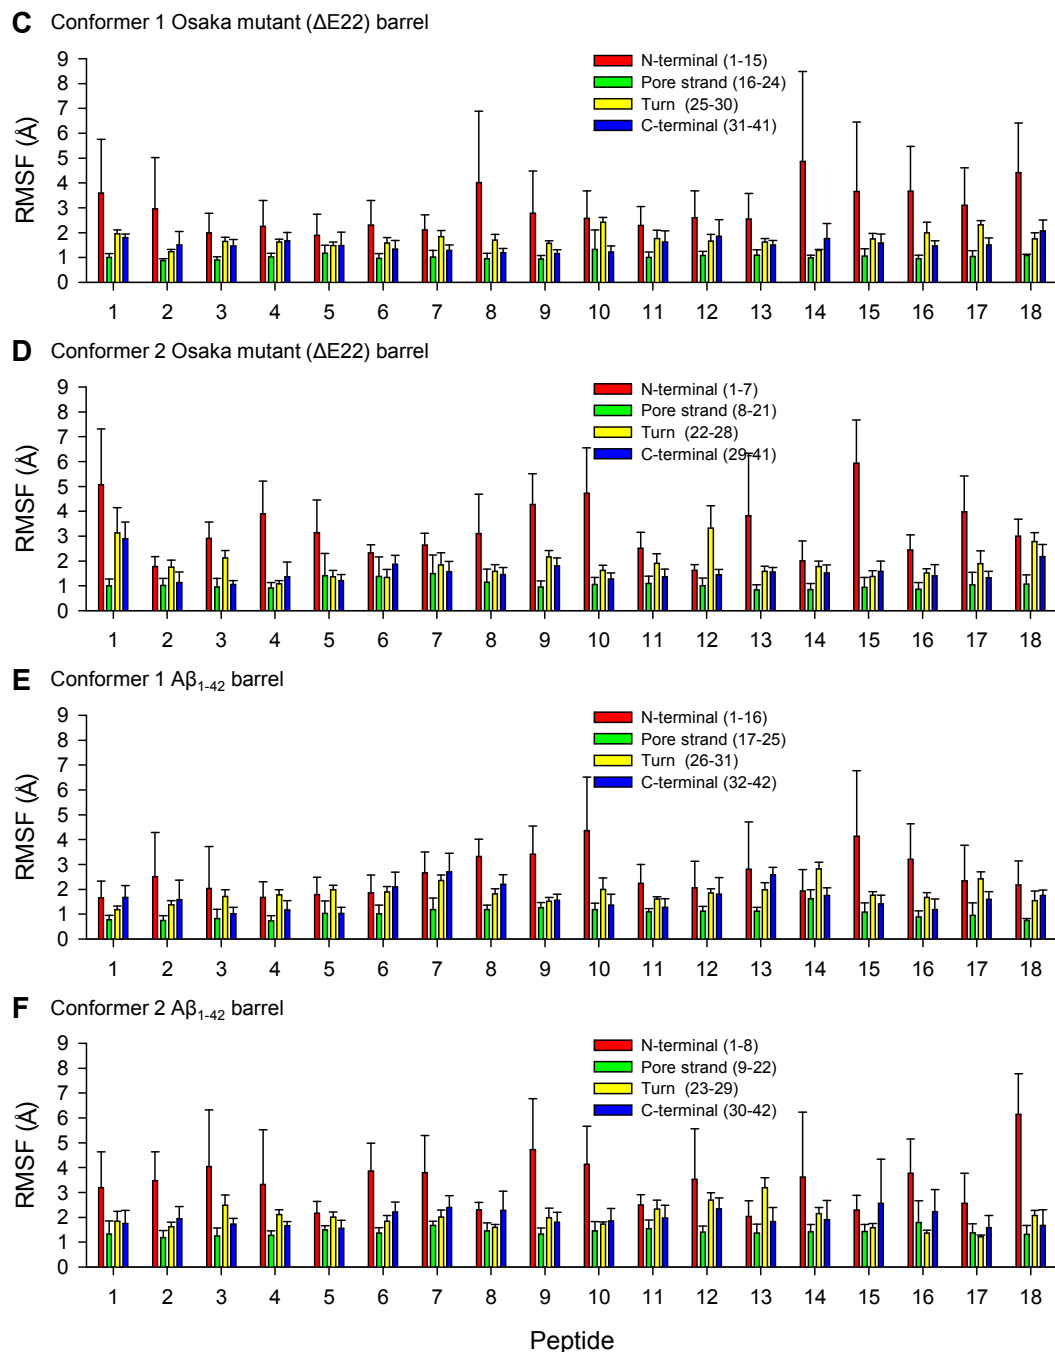

**Figure S2.** The root-mean-squared deviation (RMSD) from the starting point for backbone heavy atoms of (A) the membrane embedded U-shaped portion and (B) extramembranous N-terminal portion of  $A\beta$  barrels: the conformer 1 (red lines) and conformer 2 (green line) Osaka mutant ( $\Delta E22$ ) barrels, and the conformer 1 (yellow line) and conformer 2 (blue line)  $A\beta_{1-42}$  barrels. The average root-mean-squared-fluctuation (RMSF) from the starting point for backbone atoms of each monomer for the (C) conformer 1 and (D) conformer 2 Osaka mutant ( $\Delta E22$ ) barrels, and the (E) conformer 1 and (F) conformer 2  $A\beta_{1-42}$  barrels.

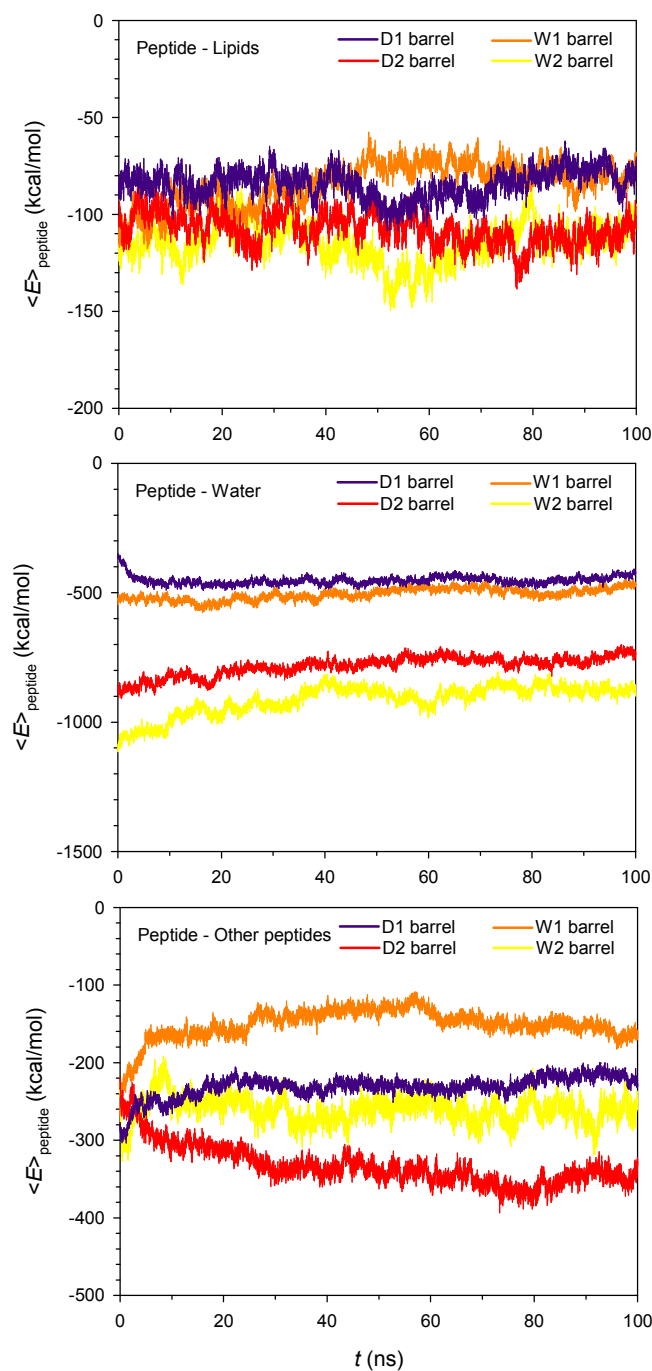

**Figure S3.** Time series of averaged interaction energy of the membrane embedded U-shaped portion of the peptide with lipids (upper panel), water (middle panel), and other peptides (bottom panel) for the conformer 1 and 2 Osaka mutant ( $\Delta E22$ ) barrels (denoted as D1 and D2, respectively), and the conformer 1 and 2 wild type  $A\beta_{1-42}$  barrels (denoted as W1 and W2, respectively).

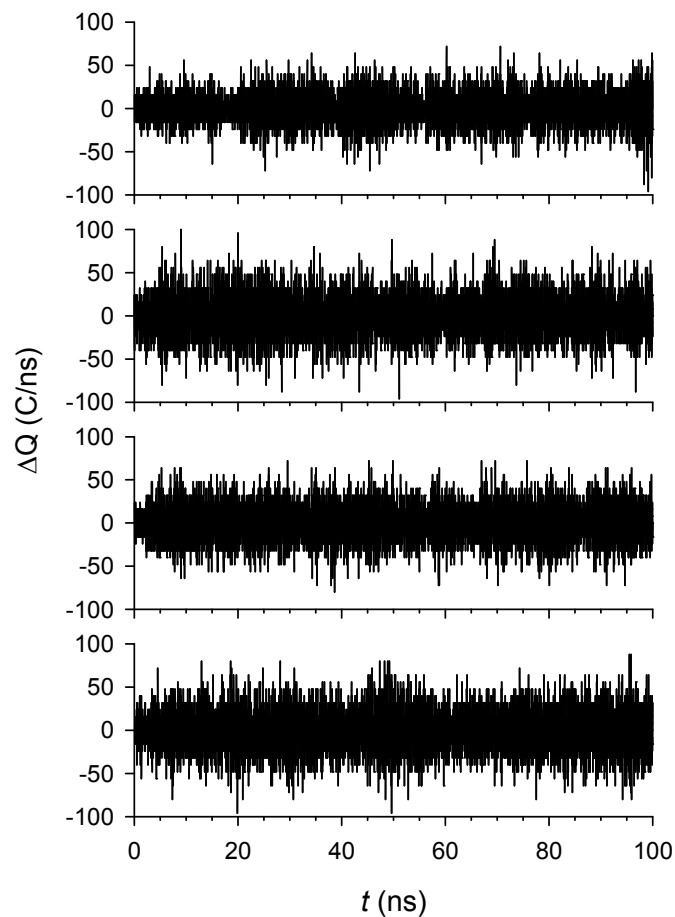

**Figure S4.** Change in total charge in the pore as a function of the simulation time for the conformer 1 and 2 Osaka mutant ( $\Delta E22$ ) barrels (1st and 2nd rows), and the conformer 1 and 2  $A\beta_{1-42}$  barrels (3rd and 4th rows). The pore height with cutoff along the pore axis,  $-1.8 < z < 1.8$  nm was used.
